# Supplementary material for: A general strategy for metal oxide nanoparticles embedded into heterogeneous carbon nanosheets as high-rate lithium-ion battery anodes
Source: Royal Society of Chemistry journal article supplement (doi:10.1039/d0ta08198a), 2020-01-01
Supplement: d0ta08198a1.pdf [file d0ta08198a1.pdf]

## Supplementary Information

### **A General Strategy for Metal Oxide Nanoparticles Embedded into Heterogeneous Carbon Nanosheets as High-Rate Lithium-Ion Battery Anodes**

Haibo Pang<sup>a,c,†</sup>, Peifeng Yu<sup>a,c,†</sup>, Fei Xu<sup>b,\*</sup>, Weicai Zhang<sup>a,c</sup>, Jing Peng<sup>a,c</sup>, Hang Hu<sup>a,c</sup>, Mingtao Zheng<sup>a,c</sup>, Yong Xiao<sup>a,c</sup>, Yingliang Liu<sup>a,c,\*</sup>, Yeru Liang<sup>a,c</sup>,

<sup>a</sup> Key Laboratory for Biobased Materials and Energy of Ministry of Education, Guangdong Provincial Engineering Technology Research Center for Optical Agriculture, College of Materials and Energy, South China Agricultural University, Guangzhou, 510642, China

<sup>b</sup> State Key Laboratory of Solidification Processing, Center for Nano Energy Materials, School of Materials Science and Engineering, Northwestern Polytechnical University and Shaanxi Joint Laboratory of Graphene (NPU), Xi'an, 710072, China

<sup>c</sup> Guangdong Laboratory of Lingnan Modern Agriculture, Guangzhou 510642, China

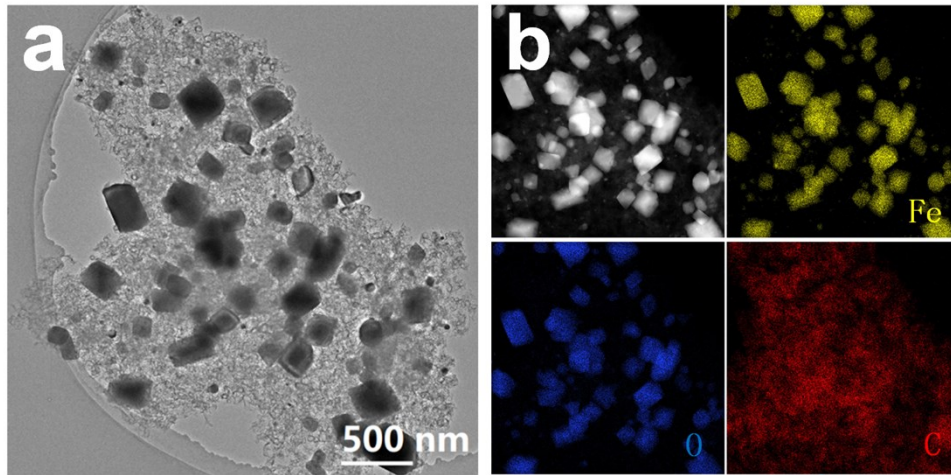

**Figure S1.** (a) TEM image of 2D-Fe<sub>2</sub>O<sub>3</sub>@HCCNSs. (b) EDX mapping images of 2D-Fe<sub>2</sub>O<sub>3</sub>@HCCNSs.

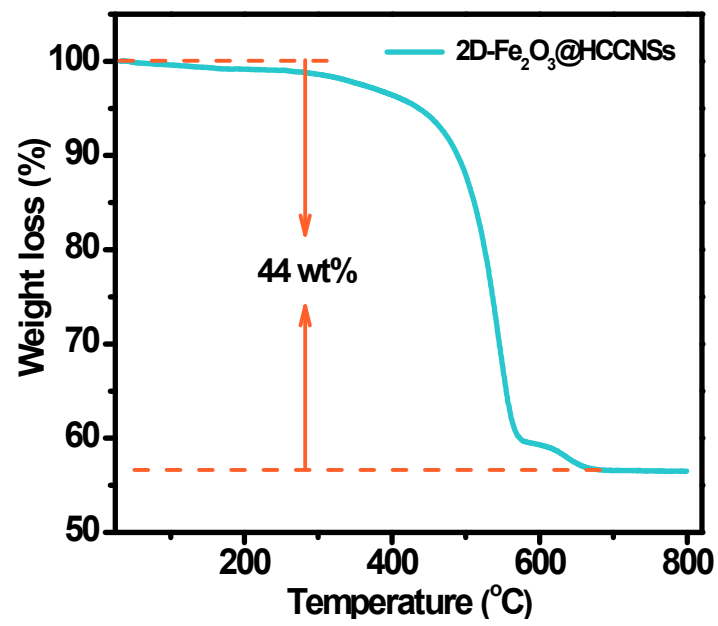

**Figure S2.** TG curve of 2D-Fe<sub>2</sub>O<sub>3</sub>@HCCNSs.

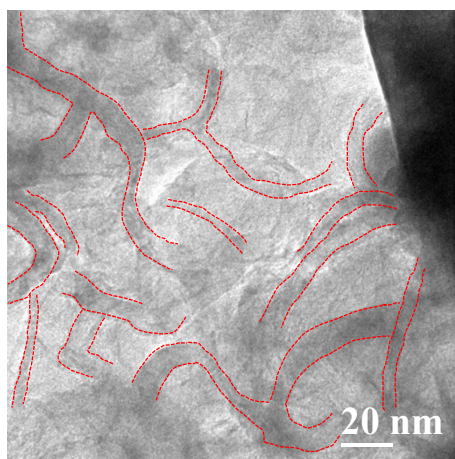

**Figure S3.** Magnified TEM image of 2D-Fe<sub>2</sub>O<sub>3</sub>@HCCNSs.

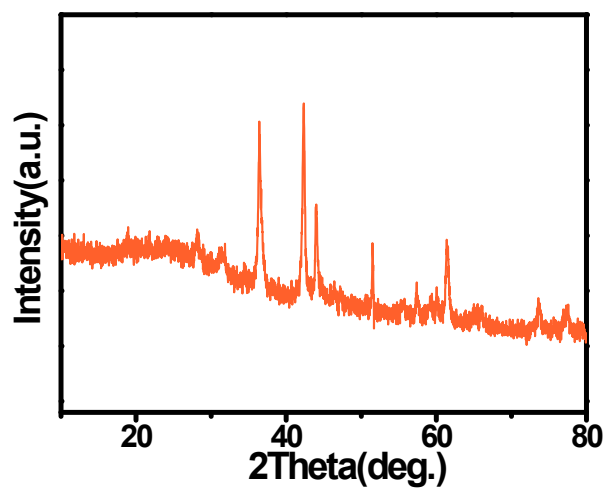

**Figure S4.** XRD pattern of 2D-CoO@HCCNSs.

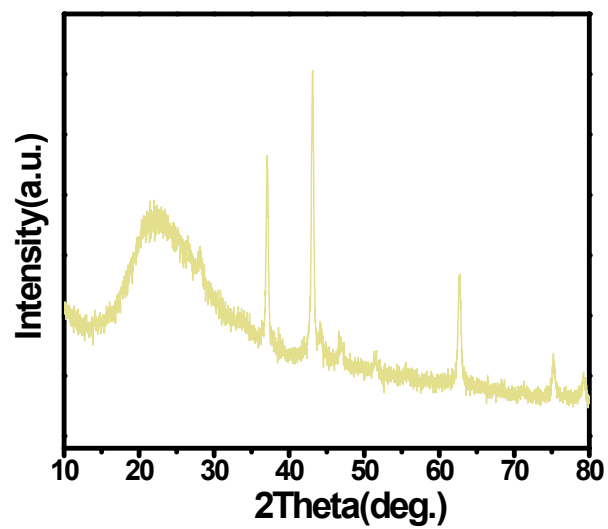

**Figure S5.** XRD pattern of 2D-NiO@HCCNSs.

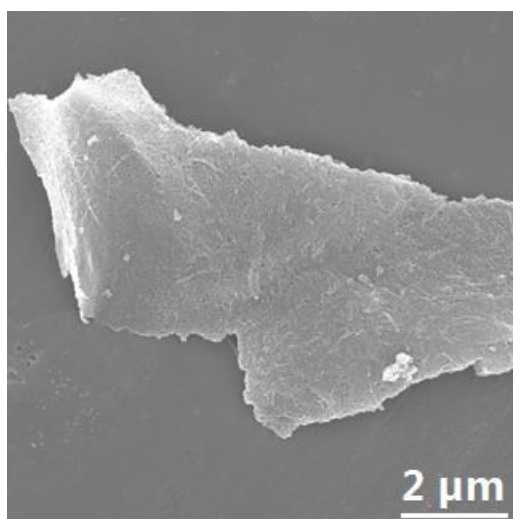

**Figure S6.** SEM image of 2D heterogeneous carbon nanosheet without  $\text{Fe}_2\text{O}_3$ .

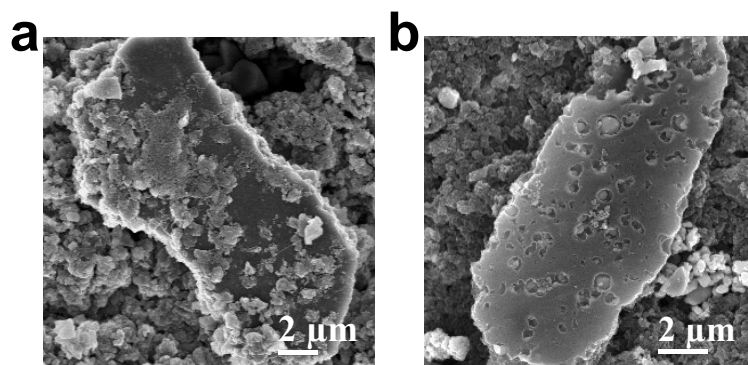

**Figure S7.** SEM images of (a) cycled electrode and (b) fresh electrode.

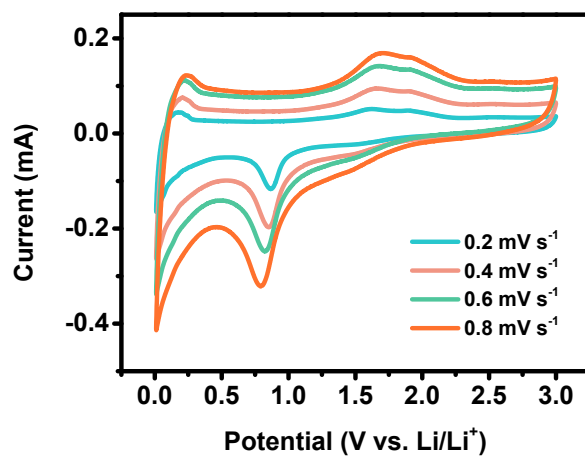

**Figure S8.** CV curves of 2D-Fe<sub>2</sub>O<sub>3</sub>@HCCNSs measured at the scan rates of 0.2, 0.4, 0.6 and 0.8 mV s<sup>-1</sup>.

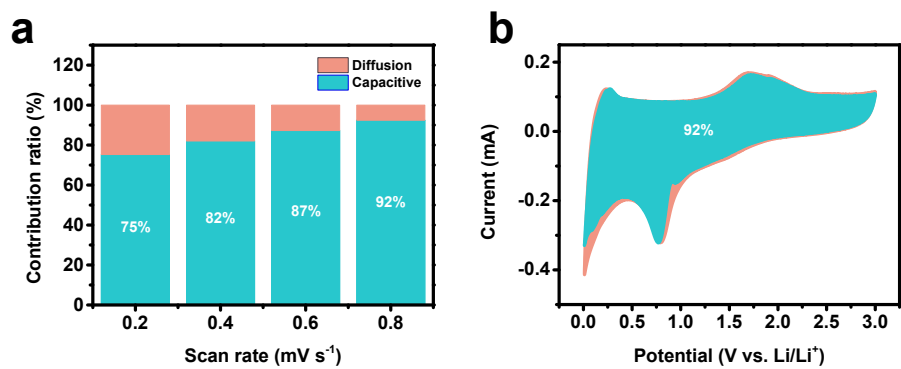

**Figure S9.** (a) Capacitive and diffusion-controlled contribution ratios of 2D-Fe<sub>2</sub>O<sub>3</sub>@HCCNSs anode at different scan rates. (b) Capacitive contribution ratio of 2D-Fe<sub>2</sub>O<sub>3</sub>@HCCNSs anode at 0.8 mV s<sup>-1</sup>.

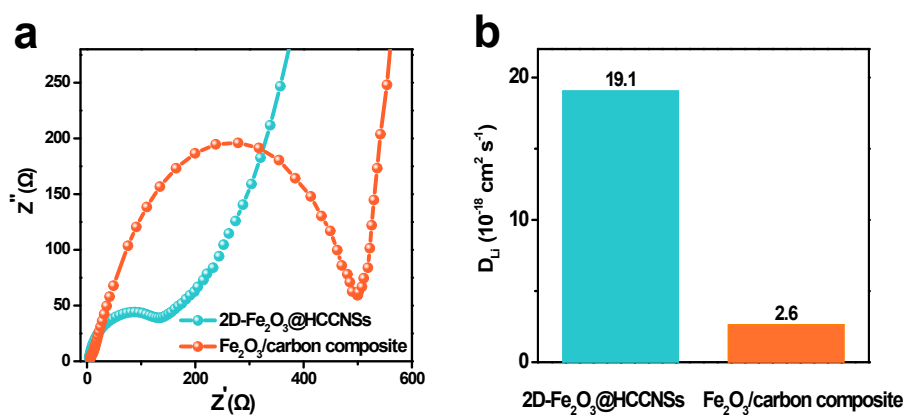

**Figure S10.** (a) EIS plots and (b) ion diffusion coefficients of 2D-Fe<sub>2</sub>O<sub>3</sub>@HCCNSs and Fe<sub>2</sub>O<sub>3</sub>/carbon composite.

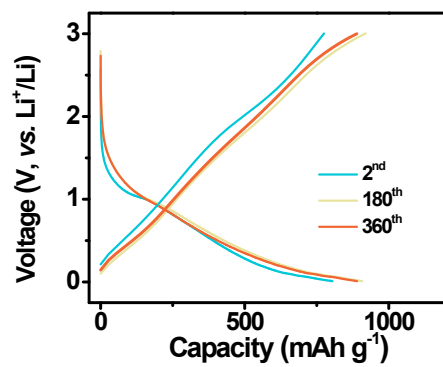

**Figure S11.** Typical charge/discharge profiles of 2D-Fe<sub>2</sub>O<sub>3</sub>@HCCNSs for different cycles.

**Table S1.** Comparisons of rate performances of 2D carbon-based anodes for LIBs.

| <b>Anodes</b>                                | <b>Current density (A g<sup>-1</sup>)</b> | <b>Charge capacity (mAh g<sup>-1</sup>)</b> | <b>Average attenuation capacity (mAh g<sup>-1</sup> A<sup>-1</sup>)</b> | <b>Ref.</b>      |
|----------------------------------------------|-------------------------------------------|---------------------------------------------|-------------------------------------------------------------------------|------------------|
| FeSe <sub>2</sub> @rGO                       | 0.1/5                                     | 813/78                                      | 150                                                                     | 1                |
| 2D Co-Cu <sub>2</sub> S@C                    | 0.2/5                                     | 950/209                                     | 154.4                                                                   | 2                |
| NiSe <sub>2</sub> nanosheets/CFC             | 0.1/2                                     | 1233/682                                    | 290.0                                                                   | 3                |
| G@SnO <sub>2</sub> @C                        | 0.2/5                                     | 800/260                                     | 112.5                                                                   | 4                |
| 2D Ga <sub>2</sub> O <sub>3</sub> /C         | 0.2/10                                    | 1100/378                                    | 73.8                                                                    | 5                |
| G@Fe <sub>3</sub> O <sub>4</sub> /NC         | 0.05/1                                    | 920/550                                     | 389.5                                                                   | 6                |
| SnO <sub>2</sub> @C NSs                      | 0.1/3                                     | 993.8/621.7                                 | 128.3                                                                   | 7                |
| C@SnO <sub>2</sub> -rGO-SnO <sub>2</sub>     | 0.2/10                                    | 1055/315                                    | 75.5                                                                    | 8                |
| MnO/C@rGO                                    | 0.1/1                                     | 1334/933.1                                  | 445.4                                                                   | 9                |
| 0D-2D SnO <sub>2</sub> QDs/MXene             | 0.05/3                                    | 887.4/364                                   | 177.4                                                                   | 10               |
| SnO <sub>2</sub> @C HNSs                     | 0.1/3                                     | 756.4/476.8                                 | 96.4                                                                    | 11               |
| Cr <sub>2</sub> O <sub>3</sub> -CC           | 0.1/2                                     | 1210/414.2                                  | 418.8                                                                   | 12               |
| S-Mn <sub>3</sub> O <sub>4</sub> -QDs/rGO    | 0.2/4                                     | 944/585                                     | 94.5                                                                    | 13               |
| NRC/Si                                       | 0.1/5                                     | 2218/572                                    | 335.9                                                                   | 14               |
| <b>2D-Fe<sub>2</sub>O<sub>3</sub>@HCCNSs</b> | <b>0.1/10</b>                             | <b>1150/437</b>                             | <b>72.0</b>                                                             | <b>This work</b> |



**Table S2.** Comparison of charge capacity and charge time between 2D-Fe<sub>2</sub>O<sub>3</sub>@HCCNSs anode and ever reported anodes in literatures.

| Anodes                                       | Current density<br>(A g <sup>-1</sup> ) | Charge capacity<br>(mAh g <sup>-1</sup> ) | Charge<br>time (min) | Ref.                 |
|----------------------------------------------|-----------------------------------------|-------------------------------------------|----------------------|----------------------|
| N-C film                                     | 20                                      | 326                                       | 0.98                 | 15                   |
| Fe <sub>3</sub> O <sub>4</sub> /carbon       | 5                                       | 674                                       | 8.09                 | 16                   |
| Fe <sub>3</sub> O <sub>4</sub> /CuO          | 12.3                                    | 204                                       | 1.00                 | 17                   |
| Graphene balls                               | 7                                       | 241                                       | 2.07                 | 18                   |
| Co@PCNS                                      | 8                                       | 510                                       | 3.82                 | 19                   |
| TiO <sub>2</sub> /SACNT                      | 10.2                                    | 100                                       | 0.59                 | 20                   |
| 1D-PSiNWs                                    | 16                                      | 587                                       | 2.20                 | 21                   |
| Al <sub>2</sub> O <sub>3</sub> @graphite     | 4                                       | 337                                       | 5.06                 | 22                   |
| CrNb <sub>11</sub> O <sub>29</sub>           | 4.01                                    | 288                                       | 4.31                 | 23                   |
| LTO-NF/TNT                                   | 1.7                                     | 160                                       | 5.73                 | 24                   |
| TiO <sub>2</sub> /MCFs                       | 3.2                                     | 141                                       | 2.64                 | 25                   |
| SPAN                                         | 5                                       | 450                                       | 5.40                 | 26                   |
| MnO@NLEFC                                    | 20                                      | 309                                       | 0.93                 | 27                   |
| MnO QD@CHNTs                                 | 50                                      | 393                                       | 0.47                 | 28                   |
| RP/TiN/CNT                                   | 3                                       | 548.8                                     | -                    | 29                   |
|                                              | 8                                       | 436.6                                     | -                    |                      |
| <b>2D-Fe<sub>2</sub>O<sub>3</sub>@HCCNSs</b> | <b>10</b>                               | <b>900</b>                                | <b>4.80</b>          | <b>This<br/>work</b> |
|                                              | <b>50</b>                               | <b>560</b>                                | <b>0.68</b>          |                      |

## References

1. F.J. Kong, L.Z. Lv, Y. Gu, S. Tao, X.F. Jiang, B. Qian and L. Gao, *J. Mater. Sci.*, 2019, **54**, 4225-4235.
2. H. Qing, R. Wang, Z. Chen, M. Li, L. Zhang, Y.N. Zhou and R. Wu, *J. Colloid Interf. Sci.*, 2020, **566**, 1-10.
3. X. Xiao, L. Ni, G. Chen, G. Ai, J. Li, T. Qiu and X. Liu, *J. Alloy. Compd.*, 2020, **821**, 153218.
4. Y.Z. Su, S. Li, D.Q. Wu, F. Zhang, H.W. Liang, P.F. Gao, C. Cheng and X.L. Feng, *ACS Nano*, 2012, **6**, 8349-8356.
5. Y. Huang, X. Tang, J. Wang, H. Ma, Y. Wang, W. Liu, G. Wang, L. Xiao, J. Lu and L. Zhuang, *Langmuir*, 2019, **35**, 13607-13613.
6. W. Xu, W. Xue, Y. Zhang, B. Zhang, Y. Wang and R. Zhao, *Mater. Lett.*, 2018, **231**, 47-50.
7. Y. Xiang, Y. Liu, K. Chen and Q. Tian, *J. Electroanal. Chem.*, 2019, **847**, 113204.
8. W. Yao, S. Wu, L. Zhan and Y. Wang, *Chem. Eng. J.*, 2019, **361**, 329-341.
9. X.-M. Tian, D.-L. Zhao, W.-J. Meng, X.-Y. Han, H.-X. Yang, Y.-J. Duan and M. Zhao, *J. Alloy. Compd.*, 2019, **792**, 487-495.
10. H. Liu, X. Zhang, Y. Zhu, B. Cao, Q. Zhu, P. Zhang, B. Xu, F. Wu and R. Chen, *Nano-Micro Lett.*, 2019, **11**, 65.
11. Q. Tian, F. Zhang and L. Yang, *Appl. Surf. Sci.*, 2019, **481**, 1377-1384.
12. D. Guo, M. Yang, L. Zhang, Y. Li, J. Wang, G. Liu, N. Wu, J.-K. Kim and X. Liu, *RSC Adv.*, 2019, **9**, 33446-33453.

13. W. Yao, W. Qiu, Z. Xu, J. Xu, J. Luo and Y. Wen, *Ceram. Int.*, 2018, **44**, 21734-21741.
14. T. Mu, P. Zuo, S. Lou, Q. Pan, Q. Li, C. Du, Y. Gao, X. Cheng, Y. Ma and G. Yin, *Chem. Eng. J.*, 2018, **341**, 37-46.
15. T. Yuan, Y. S. He, W. Zhang and Z. F. Ma, *Chem. Commun.*, 2016, **52**, 112-115.
16. S. H. Choi, Y. N. Ko, K. Y. Jung and Y. C. Kang, *Chemistry*, 2014, **20**, 11078-11083.
17. S. Saadat, J. Zhu, D. H. Sim, H. H. Hng, R. Yazami and Q. Yan, *J. Mater. Chem. A*, 2013, **1**.
18. I. H. Son, J. H. Park, S. Park, K. Park, S. Han, J. Shin, S. G. Doo, Y. Hwang, H. Chang and J. W. Choi, *Nat. Commun.*, 2017, **8**, 1561.
19. V. Etacheri, C. N. Hong, J. Tang and V. G. Pol, *ACS Appl. Mater. Interfaces*, 2018, **10**, 4652-4661.
20. K. Zhu, Y. Luo, F. Zhao, J. Hou, X. Wang, H. Ma, H. Wu, Y. Zhang, K. Jiang, S. Fan, J. Wang and K. Liu, *ACS Sustain. Chem. Eng.*, 2018, **6**, 3426-3433.
21. X. Chen, Q. Bi, M. Sajjad, X. Wang, Y. Ren, X. Zhou, W. Xu and Z. Liu, *Nanomaterials* 2018, **8**.
22. D. S. Kim, Y. E. Kim and H. Kim, *J. Power Sources*, 2019, **422**, 18-24.
23. Q. Fu, X. Liu, J. Hou, Y. Pu, C. Lin, L. Yang, X. Zhu, L. Hu, S. Lin, L. Luo and Y. Chen, *J. Power Sources*, 2018, **397**, 231-239.
24. C. Y. Bon, P. Isheunesu, S. Kim, M. Manasi, Y. I. Kim, Y. J. Lee and J. M. Ko, *Energy Technol.*, 2018, **6**, 2461-2468.
25. D. Wang, G. Zhang, Z. Shan, T. Zhang and J. Tian, *ChemElectroChem*, 2018, **5**, 540-545.

26. Y. Wu, W. Wang, J. Ming, M. Li, L. Xie, X. He, J. Wang, S. Liang and Y. Wu, *Adv. Funct. Mater.*, 2019, **29**.
27. Q. Feng, H. Li, Z. Tan, Z. Huang, L. Jiang, H. Zhou, H. Pan, Q. Zhou, S. Ma and Y. Kuang, *J. Mater. Chem. A*, 2018, **6**, 19479-19487.
28. H. Li, L. Jiang, Q. Feng, Z. Huang, H. Zhou, Y. Gong, Z. Hou, W. Yang, C. Fu and Y. Kuang, *Energy Storage Mater.*, 2019, **17**, 157-166.
29. X. Han, Z. Zhang, M. Han, Y. Cui and J. Sun, *Energy Storage Mater.*, 2020, **26**, 147-156.
